# Supplementary material
Source: MDPI journal article supplement (https://www.mdpi.com/2077-0472/13/7/1301)
Supplement: s1 [file s1]

## Supplemental Materials

# Do Pesticide Retailers' Recommendations Aggravate Pesticide Overuse? Evidence from Rural China

### Table of Contents

**Table S1.** Estimation results of falsification test of instrumental variable.

**Table S2.** Descriptive statistics of main variables across provinces

**Table S3.** Number of pest-control observations and average index application rate for each pest.

**Table S4.** Number and proportion of pesticide-overuse observations.

**Table S1.** Estimation results of falsification test of instrumental variable.

| Variable              | Pesticide retailers' recommendations | Pesticide overuse    |
|-----------------------|--------------------------------------|----------------------|
| Instrumental variable | 0.007***<br>(0.001)                  | 0.002<br>(0.001)     |
| Male                  | 0.220***<br>(0.060)                  | 0.152**<br>(0.061)   |
| Age                   | 0.003<br>(0.002)                     | 0.005**<br>(0.002)   |
| Education             | -0.031***<br>(0.006)                 | 0.001<br>(0.006)     |
| Village leader        | -0.371***<br>(0.064)                 | -0.001<br>(0.056)    |
| Technology training   | -0.394***<br>(0.043)                 | -0.165***<br>(0.041) |
| Total rice-sown area  | -0.013***<br>(0.003)                 | 0.002<br>(0.001)     |
| Late-season rice      | -0.212***<br>(0.040)                 | 0.221***<br>(0.044)  |
| Hybrid rice           | 0.209***<br>(0.038)                  | 0.088**<br>(0.043)   |
| Pesticide price       | 0.000***<br>(0.000)                  | -0.001***<br>(0.000) |
| Major pest            | -0.045<br>(0.056)                    | 0.099*<br>(0.059)    |
| Weed                  | 0.032<br>(0.063)                     | -0.295***<br>(0.068) |
| Constant              | -1.177***<br>(0.163)                 | -0.263<br>(0.170)    |
| District dummy        | Controlled                           | Controlled           |
| Observations          | 7171                                 | 5245                 |

Notes: Figures in parentheses are standard errors. \*\*\*, \*\*, and \* indicates the significance at the 1%, 5%, and 10% level, respectively.

**Table S2.** Descriptive statistics of main variables across provinces.

| Variable                                               | Guizhou        | Hubei          | Jiangsu        | Zhejiang       |
|--------------------------------------------------------|----------------|----------------|----------------|----------------|
| Pesticide retailers' recommendations (1 = yes, 0 = no) | 0.26(0.44)     | 0.27(0.44)     | 0.26(0.44)     | 0.36(0.48)     |
| Male (1 = yes, 0 = no)                                 | 0.85(0.36)     | 0.92(0.27)     | 0.87(0.33)     | 0.94(0.23)     |
| Age (years)                                            | 53.24(9.65)    | 56.14(9.32)    | 57.88(10.00)   | 58.95(8.96)    |
| Education (years)                                      | 6.22(3.08)     | 6.67(3.11)     | 7.21(3.47)     | 6.23(3.23)     |
| Village leader (1 = yes, 0 = no)                       | 0.06(0.24)     | 0.10(0.29)     | 0.12(0.32)     | 0.10(0.30)     |
| Technology training (1 = yes, 0 = no)                  | 0.17(0.38)     | 0.34(0.47)     | 0.27(0.44)     | 0.16(0.36)     |
| Total rice sown area (ha)                              | 0.15(0.10)     | 2.06(8.12)     | 1.70(6.48)     | 3.03(17.71)    |
| Late-season rice (1 = yes, 0 = no)                     | 0.05(0.21)     | 0.12(0.33)     | 0.81(0.39)     | 0.68(0.47)     |
| Hybrid rice (1 = yes, 0 = no)                          | 0.96(0.19)     | 0.63(0.48)     | 0.03(0.17)     | 0.57(0.50)     |
| Pesticide price (RMB/kg)                               | 128.68(113.60) | 161.38(150.09) | 122.83(100.52) | 120.07(125.33) |
| Instrumental variable (%)                              | 25.34(9.44)    | 26.67(13.73)   | 25.61(12.99)   | 36.34(15.60)   |
| Number of farmers                                      | 131            | 315            | 320            | 318            |

Notes: Data from the authors' survey. Figures outside and in parentheses are mean values and standard deviations, respectively.

**Table S3.** Number of pest-control observations and average index application rate for each pest.

| Pest category                                       | No. of pest-control observation                        |                                                            |             | Index application rate (g/ha)                          |                                                            |             |
|-----------------------------------------------------|--------------------------------------------------------|------------------------------------------------------------|-------------|--------------------------------------------------------|------------------------------------------------------------|-------------|
|                                                     | Farmers obtaining information from pesticide retailers | Farmers not obtaining information from pesticide retailers | All farmers | Farmers obtaining information from pesticide retailers | Farmers not obtaining information from pesticide retailers | All farmers |
| <b><u>Major pests</u></b>                           | 1301                                                   | 3654                                                       | 4955        | 603.44                                                 | 551.83                                                     | 565.38      |
| Leaf folder ( <i>Cnaphalocrocis medinalis</i> )     | 222                                                    | 557                                                        | 779         | 571.01                                                 | 659.59                                                     | 634.35      |
| Planthopper ( <i>Nilaparvata lugens</i> Stal)       | 344                                                    | 934                                                        | 1278        | 710.17                                                 | 436.74                                                     | 510.34      |
| Striped stem borer ( <i>Chilo suppressalis</i> )    | 317                                                    | 819                                                        | 1136        | 570.11                                                 | 680.82                                                     | 649.93      |
| Blast ( <i>Pyricularia oryzae</i> )                 | 190                                                    | 632                                                        | 822         | 759.77                                                 | 540.70                                                     | 591.34      |
| Sheath blight ( <i>Thanatephorus cucumeris</i> )    | 228                                                    | 712                                                        | 940         | 390.08                                                 | 480.01                                                     | 458.20      |
| <b><u>Secondary pests</u></b>                       | 197                                                    | 530                                                        | 727         | 527.78                                                 | 370.65                                                     | 413.23      |
| Aphid ( <i>Aphidoidea</i> )                         | 28                                                     | 104                                                        | 132         | 482.74                                                 | 314.33                                                     | 350.05      |
| Diamondback moth ( <i>Plutella xylostella</i> )     | 6                                                      | 11                                                         | 17          | 268.33                                                 | 212.99                                                     | 232.52      |
| Grasshopper ( <i>Oxya yezoensis</i> )               | 5                                                      | 18                                                         | 23          | 170.00                                                 | 1056.09                                                    | 863.46      |
| Pink stem borer ( <i>Sesamia inferens</i> )         | 1                                                      | 20                                                         | 21          | 7.50                                                   | 176.51                                                     | 168.46      |
| Thrip ( <i>Chloethrips oryzae</i> )                 | 22                                                     | 26                                                         | 48          | 516.04                                                 | 311.90                                                     | 405.46      |
| Weevil ( <i>Echinocnemus squameus</i> Billberg)     | 6                                                      | 18                                                         | 24          | 1865.63                                                | 1192.64                                                    | 1360.89     |
| Yellow stem borer ( <i>Scirpophaga incertulas</i> ) | 19                                                     | 42                                                         | 61          | 309.12                                                 | 450.99                                                     | 406.80      |
| Damping off ( <i>Rhizoctonia solani</i> )           | 6                                                      | 15                                                         | 21          | 3262.50                                                | 424.59                                                     | 1235.42     |
| Downy mildew ( <i>Peronospora</i> spp.)             | 52                                                     | 88                                                         | 140         | 548.08                                                 | 279.68                                                     | 379.37      |
| False smut ( <i>Ustilaginoidea oryzae</i> )         | 20                                                     | 114                                                        | 134         | 85.33                                                  | 269.69                                                     | 242.17      |
| Sheath rot ( <i>Sarocladium oryzae</i> )            | 12                                                     | 9                                                          | 21          | 379.41                                                 | 566.67                                                     | 459.66      |
| Stripe ( <i>Coniella castaneicola</i> )             | 8                                                      | 31                                                         | 39          | 137.75                                                 | 385.85                                                     | 334.96      |
| Other secondary pests (NA)                          | 12                                                     | 34                                                         | 46          | 344.23                                                 | 340.24                                                     | 341.29      |
| <b><u>Weeds</u></b>                                 | 428                                                    | 1061                                                       | 1489        | 1138.83                                                | 958.10                                                     | 1010.05     |

Notes: Words in parentheses are Latin name of each pest.

**Table S4.** Number and proportion of pesticide-overuse observations.

| Pest category                                       | Farmers obtaining information from pesticide retailers |                | Farmers not obtaining information from pesticide retailers |                | All farmers |                |
|-----------------------------------------------------|--------------------------------------------------------|----------------|------------------------------------------------------------|----------------|-------------|----------------|
|                                                     | Number                                                 | Proportion (%) | Number                                                     | Proportion (%) | Number      | Proportion (%) |
| <b><u>Major pests</u></b>                           | 809                                                    | 62.18          | 2089                                                       | 57.17          | 2898        | 58.49          |
| Leaf folder ( <i>Cnaphalocrocis medinalis</i> )     | 136                                                    | 61.26          | 295                                                        | 52.96          | 431         | 55.33          |
| Planthopper ( <i>Nilaparvata lugens</i> Stal)       | 231                                                    | 67.15          | 574                                                        | 61.46          | 805         | 62.99          |
| Striped stem borer ( <i>Chilo suppressalis</i> )    | 176                                                    | 55.52          | 451                                                        | 55.07          | 627         | 55.19          |
| Blast ( <i>Pyricularia oryzae</i> )                 | 109                                                    | 57.37          | 344                                                        | 54.43          | 453         | 55.11          |
| Sheath blight ( <i>Thanatephorus cucumeris</i> )    | 157                                                    | 68.86          | 425                                                        | 59.69          | 582         | 61.91          |
| <b><u>Secondary pests</u></b>                       | 117                                                    | 59.39          | 283                                                        | 53.40          | 400         | 55.02          |
| Aphid ( <i>Aphidoidea</i> )                         | 21                                                     | 75.00          | 78                                                         | 75.00          | 99          | 75.00          |
| Diamondback moth ( <i>Plutella xylostella</i> )     | 2                                                      | 33.33          | 4                                                          | 36.36          | 6           | 35.29          |
| Grasshopper ( <i>Oxya yezoensis</i> )               | 0                                                      | 0.00           | 8                                                          | 44.44          | 8           | 34.78          |
| Pink stem borer ( <i>Sesamia inferens</i> )         | 0                                                      | 0.00           | 11                                                         | 55.00          | 11          | 52.38          |
| Thrip ( <i>Chloethrips oryzae</i> )                 | 19                                                     | 86.36          | 11                                                         | 42.31          | 30          | 62.50          |
| Weevil ( <i>Echinocnemus squameus</i> Billberg)     | 6                                                      | 100.00         | 7                                                          | 38.89          | 13          | 54.17          |
| Yellow stem borer ( <i>Scirpophaga incertulas</i> ) | 10                                                     | 52.63          | 18                                                         | 42.86          | 28          | 45.90          |
| Damping off ( <i>Rhizoctonia solani</i> )           | 6                                                      | 100.00         | 7                                                          | 46.67          | 13          | 61.90          |
| Downy mildew ( <i>Peronospora</i> spp.)             | 33                                                     | 63.46          | 42                                                         | 47.73          | 75          | 53.57          |
| False smut ( <i>Ustilaginoidea oryzae</i> )         | 4                                                      | 20.00          | 59                                                         | 51.75          | 63          | 47.01          |
| Sheath rot ( <i>Sarocladium oryzae</i> )            | 11                                                     | 91.67          | 6                                                          | 66.67          | 17          | 80.95          |
| Stripe ( <i>Coniella castaneicola</i> )             | 1                                                      | 12.50          | 12                                                         | 38.71          | 13          | 33.33          |
| Other secondary pests (NA)                          | 4                                                      | 33.33          | 20                                                         | 58.82          | 24          | 52.17          |
| <b><u>Weeds</u></b>                                 | 162                                                    | 37.85          | 443                                                        | 41.75          | 605         | 40.63          |

Notes: Words in parentheses are Latin name of each pest.
